# Supplementary material for: Clinical and Biochemical Assessment of Maintenance Treatment in Chronic Recurrent Seborrheic Dermatitis: Randomized Controlled Study
Source: Springer Nature journal article supplement (doi:10.1007/s13555-014-0047-0), 2014-03-18
Supplement: MOESM1 [file 9271016]

- This randomized, open label, clinical study was conducted from January to March 2012 in France and Portugal in 67 subjects suffering from chronic recurrent seborrheic dermatitis (SD).
- The efficacy of a 8-week maintenance treatment, following a 2-week intensive treatment phase, was assessed clinically, biochemically and microbiologically.
- Two parallel groups (maintenance treatment shampoo once a week or discontinuation) were compared.
- This study showed correlations between clinical, biological and biochemical parameters of SD, confirming the interest of biomolecular endpoints to assess SD treatment.
- It objectively confirmed the efficacy of the maintenance treatment regimen.

This summary slide represents the opinions of the authors. Sponsorship for this study was funded by Pierre Fabre Dermocosmétique (Boulogne Billancourt, France). Medical writing assistance for this study was provided by Santé Active Edition (Bois-Colombes, France) . For a full list of acknowledgments and conflicts of interest for all authors of this article, please see the full text online. Copyright © The Authors 2014. Creative Commons Attribution Noncommercial License (CC BY-NC).
